# Supplementary material
Source: Research Square preprint supplement (doi:10.21203/rs.3.rs-8853601/v1)
Supplement: Supplementary file 1 [file d866d263824f3b66e5b47441.docx]

***Supplementary information to:***

**The under-ice habitat constitutes a critical survival hub for zooplankton in the Central Arctic Ocean**

A Cornils, H Flores, KJ Wermeyer, P Anhaus, CJ Ashjian, RG Campbell, G Castellani, C Gelfman, N Hildebrandt, CJM Hoppe, C Katlein, N Knüppel, S Sakinan, FL Schaafsma, K Schmidt, KM Shoemaker, M Vortkamp, MOSAiC TEAMs ECO, ICE & OCEAN, B Niehoff

**Suppl. Table 1**: Horizontal Under-ice net sampling stations during MOSAiC from November 2019 to May 2020 at the under-ice surface and at 10 m depth.; stations marked with asterisks (*) were only sampled at 10 m depth; from 2 samples (**) at the IWI subsamples of 10% were taken for molecular purposes; ***Number of organisms removed for stable isotope/fatty acid analysis.

| **Cruise leg** | **Station** | **Date** | **Time (local)** | **Position** | | **Organisms removed***** | |
| --- | --- | --- | --- | --- | --- | --- | --- |
|  |  |  |  | Longitude | Latitude | IWI | 10 m |
| 1 | 06-118* | 10.11.2019 | 09:07 | 116.077 | 85.822 |  | 142 |
| 1 | 10-113 | 06.12.2019 | 18:13 | 122.301 | 86.142 | 1 |  |
| 1 | 10-113 | 06.12.2019 | 23:24 | 122.301 | 86.142 |  |  |
| 1 | 10-113 | 07.12.2019 | 05:35 | 122.301 | 86.142 |  |  |
| 1 | 10-113 | 07.12.2019 | 11:41 | 122.301 | 86.142 |  | 1 |
| 2 | 18-089 | 04.01.2020 | 12:31 | 115.393 | 87.007 | 2 | 31 |
| 2 | 19-115* | 11.01.2020 | 08:20 | 111.325 | 87.214 |  | 157 |
| 2 | 20-101 | 18.01.2020 | 07:57 | 98.298 | 87.413 | 76 | 140 |
| 2 | 21-125** | 25.01.2020 | 18:13 | 92.830 | 87.405 | 1 | 71 |
| 2 | 22-107 | 02.02.2020 | 08:22 | 95.280 | 87.345 |  |  |
| 2 | 23-116 | 08.02.2020 | 07:37 | 93.862 | 87.669 |  | 107 |
| 2 | 25-104 | 22.02.2020 | 07:44 | 64.891 | 88.573 |  | 176 |
| 3 | 30-069 | 07.03.2020 | 10:09 | 27.204 | 88.076 | 4 |  |
| 3 | 32-078** | 22.03.2020 | 08:29 | 15.682 | 86.230 | 193 | 1 |
| 3 | 33-083* | 28.03.2020 | 09:14 | 13.340 | 85.626 |  |  |
| 3 | 35-032 | 07.04.2020 | 08:46 | 14.534 | 84.502 | 5 |  |
| 3 | 35-095 | 11.04.2020 | 07:57 | 14.749 | 84.332 | 3 | 4 |
| 3 | 36-112 | 18.04.2020 | 08:36 | 13.819 | 84.454 | 1 |  |
| 3 | 37-108 | 25.04.2020 | 08:53 | 15.646 | 84.018 | 15 |  |
| 3 | 38-091 | 02.05.2020 | 08:15 | 17.562 | 83.910 | 35 | 9 |
| 3 | 39-077 | 09.05.2020 | 08:23 | 14.128 | 83.791 | 5 |  |
| 5 | 59-369* | 29.08.2020 | 09:30 | 109.271 | 88.094 | 134 |  |
| 5 | 60-167 | 05.09.2020 | 07:16 | 119.459 | 88.750 | 160 | 51 |
| 5 | 61-200 | 12.09.2020 | 08:59 | 101.628 | 88.771 | 43 | 247 |

**Suppl. Table 2**: Number of taxa found in the ROV net samples during the MOSAiC drift expedition from November 2019 to September 2020. Taxa with single occurrences are marked with asterisks (x).

| **Phylum** | **Class** | **Order** | **Family** | **Genus** | **Species** | **Taxon** |
| --- | --- | --- | --- | --- | --- | --- |
| Annelida | Polychaeta |  |  |  |  | Polychaeta |
|  |  | Phyllodocida | Typhloscolecidae |  |  | Typhloscolecidae |
| Arthropoda | Copepoda | Calanoida | Aetideidae |  |  | Aetideidae, CI-CV |
|  |  |  |  | *Chiridius* | *C. obtusifrons* | *Chiridius obtusifrons*,female |
|  |  |  |  | *Gaetanus* | *G. tenuispinus* | *Gaetanus tenuispinus*,female |
|  |  |  |  | *Jaschnovia* | *Jaschnovia* sp. | *Jaschnovia* sp., female |
|  |  |  | Calanidae | *Calanus* | *C. finmarchicus* | *Calanus finmarchicus* |
|  |  |  |  |  | *C. glacialis* | *Calanus glacialis* |
|  |  |  |  |  | *C. hyperboreus* | *Calanus hyperboreus* |
|  |  |  | Clausocalanidae | *Microcalanus* |  | *Microcalanus* spp. |
|  |  |  |  | *Pseudocalanus* |  | *Pseudocalanus* spp. |
|  |  |  | Euchaetidae | *Paraeuchaeta* |  | *Paraeuchaeta* spp. |
|  |  |  | Heterorhabdidae |  |  | Heterorhabdidae  (*Heterorhabdus norvegicus*) |
|  |  |  | Lucicutiidae | *Lucicutia* |  | *Lucicutia* spp. |
|  |  |  | Metridinidae | *Metridia* | *M. longa* | *Metridia longa* |
|  |  |  | Scolecitrichidae | *Scaphocalanus* | *S. magnus* | *Scaphocalanus magnus* |
|  |  |  |  | *Scaphocalanus* | *Scaphocalanus* sp. | *Scaphocalanus* sp. |
|  |  |  |  | *Scolecithricella* | *S. minor* | *Scolecithricella minor* |
|  |  |  | Spinocalanidae | *Spinocalanus* |  | *Spinocalanus* spp. |
|  |  | Cyclopoida | Oithonidae | *Oithona* |  | *Oithona* spp. |
|  |  |  | Oncaeidae |  |  | Oncaeidae |
|  |  |  | Cyclopinidae | *Cyclopina* |  | *Cyclopina* spp. |
|  |  | Harpacticoida |  |  |  | Harpacticoida |
|  |  |  | Ectinosomatidae |  |  | Ectinosomatidae |
|  | Malacostraca | Amphipoda | Calliopiidae | *Apherusa* | *A. glacialis* | *Apherusa glacialis* |
|  |  |  | Hyperiidae | *Themisto* | *T. abyssorum* | *Themisto abyssorum* |
|  |  |  |  |  | *T. libellula* | *Themisto libellula* |
|  |  |  | Uristidae | *Onisimus* | *Onisimus* sp. | *Onisimus* sp.x |
|  |  |  |  | *Eusirus* | *E. holmi* | *Eusirus holmi* |
|  |  | Euphausiacea | Euphausiidae |  |  | Euphausiacea  (*Thysanoessa longicaudata*) |
|  |  | Isopoda |  |  |  | Isopoda |
|  | Ostracoda | Halocyprida | Halocyprididae |  |  | Ostracoda |
| Chaetognatha | Sagittoidea | Aphragmophora | Sagittidae | *Parasagitta* | *P. elegans* | *Parasagitta elegans* |
|  |  | Phragmophora | Eukrohniidae | *Eukrohnia* | *E. hamata* | *Eukrohnia hamata* |
| Chordata | Actinopteri |  |  | *Boreogadus* | *B. saida* | *Boreogadus saida* x |
|  | Appendicularia | Copelata | Fritillariidae |  |  | Fritillariidae |
|  |  |  | Oikopleuridae |  |  | Oikopleuridae |
| Cnidaria | Hydrozoa |  |  |  |  | Cnidaria (*Botrynema* spp.,  *Sminthea arctica*) |
|  |  | Anthoathecata |  | *Corymorpha* | *Corymorpha* sp. | *Corymorpha* sp. |
|  |  | Siphonophorae |  |  |  | Siphonophorae |
| Ctenophora |  |  |  |  |  | Ctenophora (*Beroe cucumis, Mertensia ovum*) |
| Mollusca | Gastropoda |  |  |  |  | Gastropoda |
| Rhizaria | Foraminifera |  |  |  |  | Foraminifera |

**Suppl. Table 3**: Conversion factors from wet mass (WM) to dry mass (DM) and carbon content (C) derived from Kjørboe (2013), aKosobokova and Hirche (2000), bCornils et al. (2022) and cPostel et al. (2000), respiration factors (RFt) from Ikeda (2014 – global).

| **Phylum** | **Taxon** | **Original taxon** | **WM - DM** | **DM - C** | **RFt** |
| --- | --- | --- | --- | --- | --- |
| Annelida | Polychaeta | *Tomopteris* spp. | 0.134 | 0.370 | 0.382 |
| Arthropoda | Copepoda | “Arctic Copepoda” | 0.162a | 0.480 | 0 |
|  |  | *C. hyperboreus* | 0.08b | 0.480 | 0 |
|  | Amphipoda |  | 0.239 | 0.345 | 0.416 |
|  | *Parathemisto* | *P. libellula* | 0.224 | 0.382 | 0.416 |
|  | Euphausiacea |  | 0.228 | 0.419 | 0.697 |
|  | Ostracoda |  | 0.182 | 0.435 | -0.395 |
|  | Crustacea |  | 0.182 | 0.435 | 0.416 |
| Chaetognatha | Chaetognatha | *Eukrohnia hamata* | 0.093 | 0.350 | -0.448 |
| Chordata | Appendicularia | Tunicata | 0.054 | 0.103 | 1.604 |
| Cnidaria | Cnidaria |  | 0.041 | 0.132 | -0.480 |
| Ctenophora | Ctenophora |  | 0.04 | 0.051 | -1.257 |
| *Mollusca* | Mollusca | *Limacina helicina* | 0.230 | 0.289 | 0 |
|  | Other zooplankton |  | 0.2c | WM - C  0.12 | 0 |

**Suppl. Table 4: Results of the PERMANOVA based on Bray-Curtis similarities on log-transformed abundances of the under-ice zooplankton community;** used model: Region + Regime + depth stratum. The permutation test (999 permutations) was conducted using *adonis2()* in the *vegan* R package (Oksanen et al. 2024); significances: *** p < 0.001, ** p < 0.01, * p < 0.05.

| **Factor** | **Degrees of Freedom** | **Sum of Squares** | **F** | **R²** | **p-value** | **Significance** |
| --- | --- | --- | --- | --- | --- | --- |
| Region | 2 | 1.1590 | 13.22 | 0.277 | 0.001 | *** |
| Regime | 2 | 1.1071 | 12.63 | 0.264 | 0.001 | *** |
| Depth | 1 | 0.2597 | 5.93 | 0.062 | 0.002 | ** |
| Residual | 38 | 1.6654 | — | 0.397 | — | — |
| **Total** | 43 | 4.1912 | — | 1.000 | — | — |

A PERMANOVA indicated that season had similar and significant effects on community composition (Region: F = 13.22, R² = 0.28, p = 0.001, Regime: F = 12.62, R2 = 0.26, p = 0.001, Depth: F = 5.93, R2 = 0.06, p = 0.002), together explaining about 60% of the total variation (Suppl. Table 4). Only main effects were tested due to unbalanced replication across all combinations of the three factors. Tests for homogeneity of multivariate dispersion indicated a higher within-group dispersion in the Amundsen Basin (average distance to centroid = 028) compared to the Gakkel Ridge (0.19) and the Nansen Basin (0.13), reflecting broader seasonal coveraged in the Amundsen Sea, whereas dispersion was similar across regimes (AUT: 0.22, WIN:0.22, SPR: 0.20) and depth strata (IWI: 0.28, 10 m: 0.29; Suppl. Table 5).

**Suppl. Table 5: Dispersion homogeneity**; tested with *betadisper()* and *permutest()* from the *vegan* R package (Oksanen et al. 2024); using Bray–Curtis dissimilarities (999 permutations).

| **Factor** | **Groups (average distance to centroid)** | **Average distance to median** | **p-value (*permutest*)** |
| --- | --- | --- | --- |
| Region | AB: 0.284,  GK: 0.188,  NB: 0.132 | 0.002 | Slight heterogeneity among regions |
| Regime | AUT: 0.221,  SPR: 0.200,  WIN: 0.225 | 0.676 | Homogeneous dispersion |
| Depth | 0 m: 0.282,  10 m: 0.295 | — | Homogeneous dispersion |

**Suppl. Table 6:** NBSS slopes for individual sampling dates (see Suppl. Table 1).

| **Station** | **Regime** | **Region** | **Depth layer** | **Slope** | **Intercept** | **R2** | **Bins** |
| --- | --- | --- | --- | --- | --- | --- | --- |
| **06-118** | WIN | AB | 10 m | -0.740 | 1.370 | 0.698 | 14 |
| **10-113** | WIN | AB | 10 m | -0.526 | 2.683 | 0.539 | 16 |
| **10-113** | WIN | AB | IWI | -0.705 | -0.074 | 0.815 | 13 |
| **10-113** | WIN | AB | IWI | -0.758 | 0.984 | 0.814 | 11 |
| **10-113** | WIN | AB | 10 m | -0.214 | 5.328 | 0.147 | 13 |
| **10-113** | WIN | AB | IWI | -0.451 | 4.001 | 0.561 | 11 |
| **10-113** | WIN | AB | 10 m | -0.284 | 5.084 | 0.233 | 15 |
| **10-113** | WIN | AB | IWI | -0.567 | 2.132 | 0.594 | 13 |
| **10-113** | WIN | AB | 10 m | -0.538 | 3.511 | 0.517 | 16 |
| **18-089** | WIN | AB | 10 m | -0.333 | 4.605 | 0.257 | 14 |
| **19-115** | WIN | AB | IWI | -0.690 | 1.281 | 0.680 | 14 |
| **19-115** | WIN | AB | 10 m | -0.530 | 3.493 | 0.396 | 14 |
| **20-101** | WIN | AB | 10 m | -0.478 | 2.717 | 0.307 | 14 |
| **20-101** | WIN | AB | IWI | -0.570 | 2.240 | 0.608 | 13 |
| **21-125** | WIN | AB | IWI | -0.688 | 0.673 | 0.751 | 13 |
| **21-125** | WIN | AB | 10 m | -0.525 | 2.044 | 0.593 | 14 |
| **22-107** | WIN | AB | 10 m | -0.601 | 2.718 | 0.533 | 16 |
| **22-107** | WIN | AB | IWI | -0.439 | 3.813 | 0.484 | 12 |
| **23-116** | WIN | AB | IWI | -0.652 | 1.482 | 0.816 | 14 |
| **23-116** | WIN | AB | 10 m | -0.237 | 4.616 | 0.134 | 13 |
| **25-104** | WIN | AB | IWI | -0.321 | 3.371 | 0.429 | 14 |
| **25-104** | WIN | AB | 10 m | -0.477 | 3.724 | 0.523 | 16 |
| **30-069** | SPR | AB | 10 m | -0.723 | -0.583 | 0.844 | 13 |
| **30-069** | SPR | AB | IWI | -0.688 | -1.062 | 0.848 | 14 |
| **32-078** | SPR | GR | 10 m | -0.810 | -2.711 | 0.725 | 12 |
| **32-078** | SPR | GR | IWI | -0.407 | 1.518 | 0.360 | 13 |
| **33-083** | SPR | GR | 10 m | -0.608 | -0.311 | 0.804 | 11 |
| **35-032** | SPR | GR | IWI | -0.775 | -1.648 | 0.739 | 14 |
| **35-032** | SPR | GR | 10 m | -0.733 | -1.742 | 0.652 | 12 |
| **35-095** | SPR | NB | 10 m | -0.801 | -1.331 | 0.617 | 13 |
| **35-095** | SPR | NB | IWI | -0.939 | -0.581 | 0.843 | 12 |
| **36-112** | SPR | NB | 10 m | -1.184 | -3.178 | 0.840 | 11 |
| **36-112** | SPR | NB | IWI | -1.087 | -3.652 | 0.772 | 10 |
| **37-108** | SPR | NB | 10 m | -1.301 | -5.620 | 0.737 | 12 |
| **37-108** | SPR | NB | IWI | -1.007 | -2.748 | 0.820 | 14 |
| **38-091** | SPR | NB | 10 m | -1.029 | -3.989 | 0.534 | 11 |
| **38-091** | SPR | NB | IWI | -0.843 | -1.359 | 0.658 | 13 |
| **39-077** | SPR | NB | 10 m | -0.934 | -1.645 | 0.572 | 12 |
| **39-077** | SPR | NB | IWI | -1.091 | -3.713 | 0.737 | 11 |
| **59-369** | AUT | AB | 10 m | -0.817 | 3.983 | 0.851 | 14 |
| **61-200** | AUT | AB | 10 m | -0.623 | 3.160 | 0.596 | 15 |
| **60-167** | AUT | AB | IWI | -1.015 | -1.755 | 0.765 | 14 |
| **60-167** | AUT | AB | 10 m | -0.797 | 1.666 | 0.718 | 13 |
| **61-200** | AUT | AB | IWI | -0.572 | 0.411 | 0.363 | 14 |

**Suppl. Figure 1:** *Cluster analysis and Elbow plot based on the (A) under-ice zooplankton communities and (B) environmental variables of the sampling dates during the MOSAiC drift expedtion 2019/2020.*


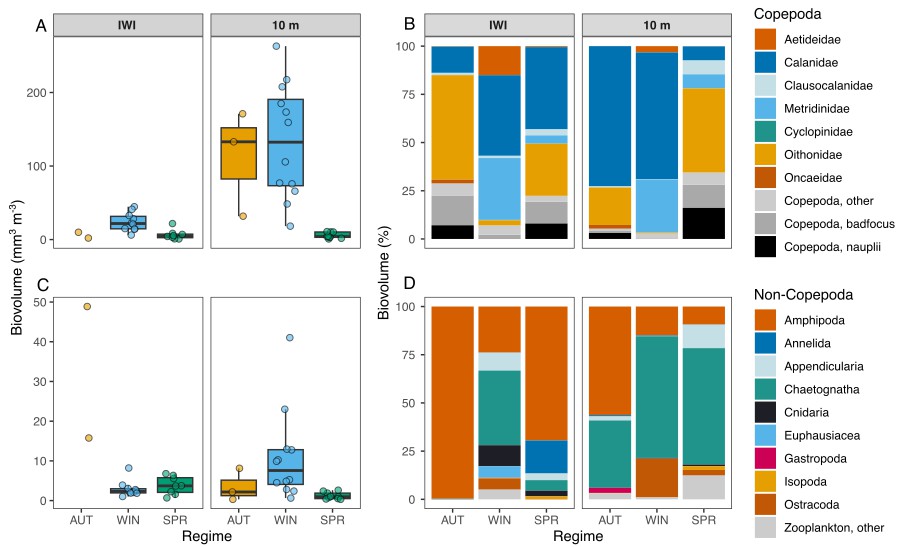


**Suppl. Figure 2**: *The biovolume (mm3 m-3; top) of the under-ice fauna at the Ice-Water-Interface (IWI) and at 10 m depth (10 m) during the MOSAiC drift for (A) Copepoda and (C) other zooplankton coloured by regime (summer/autumn, winter, spring), and the relative biovolume composition of (B) copepod families (%) and of (D) non-copepod taxa (%) of the under-ice fauna during the four regimes.*


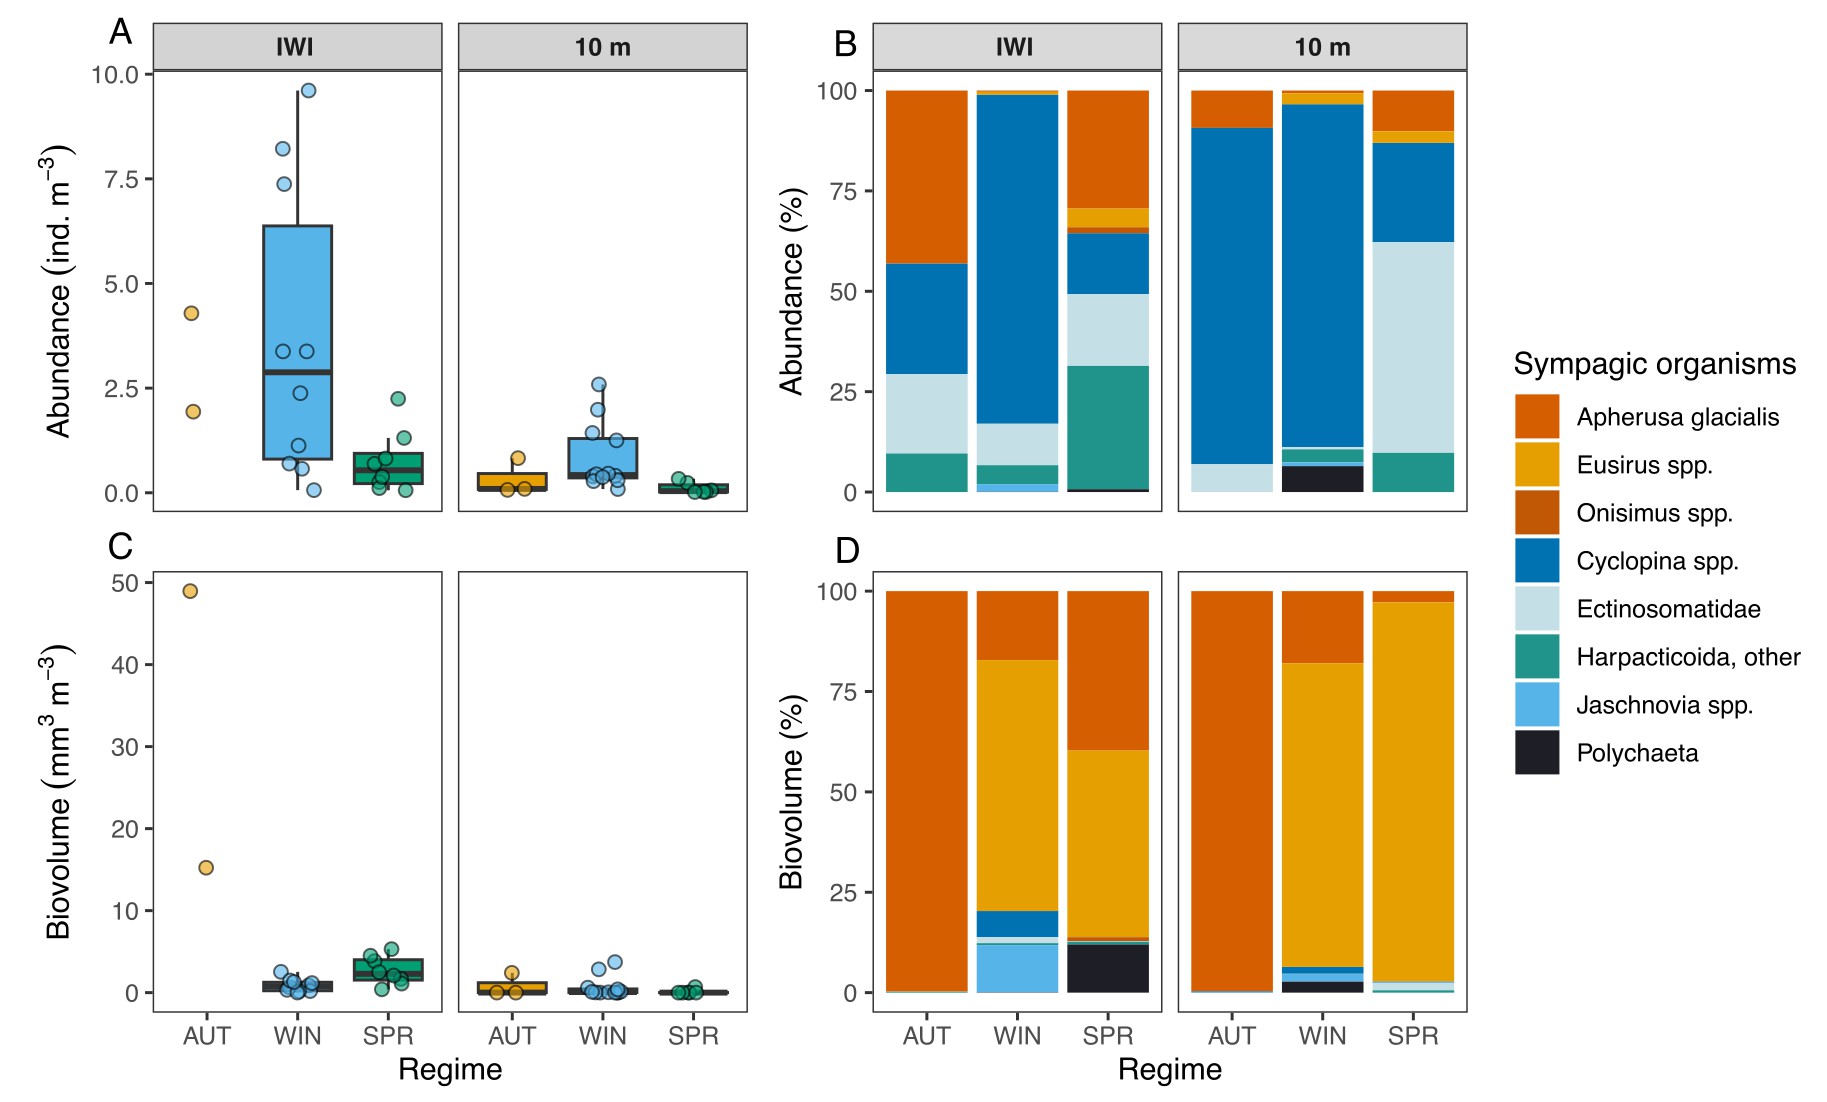


**Suppl. Figure 3**: *Taxa that represent sympagic (ice-associated) organisms of the under-ice fauna at the Ice-Water-Interface (IWI) and at 10 m depth (10 m) during the three regimes summer/autumn (AUT), winter (WIN) and spring (SPR), displaying their (A) total (ind. m-3) and (B) relative abundance (%), and their (C) total (mm3 m-3) and (D) relative biovolume (%).*


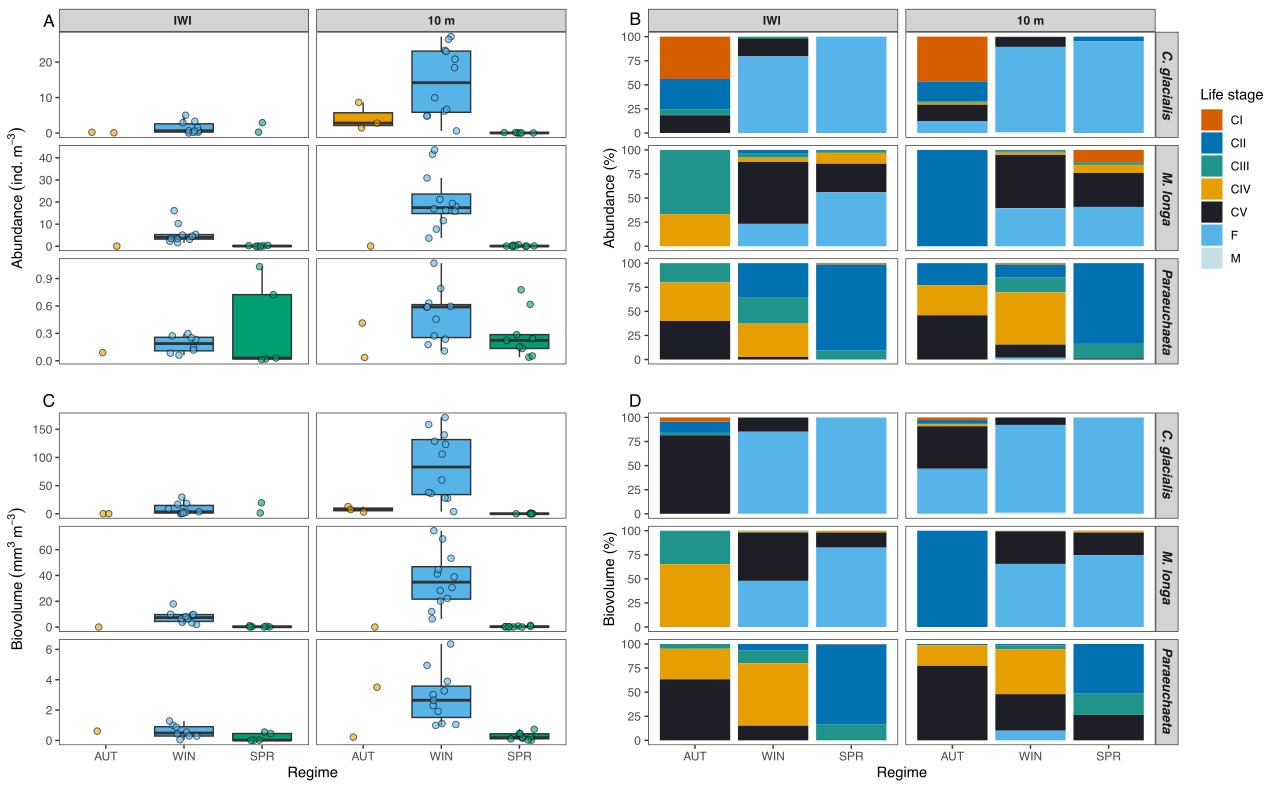


***Suppl. Figure 4:*** *Abundance and biovolume of Calanus glacialis, Metridia longa and Paraeuchaeta spp. at the Ice-Water-Interface (IWI) and at 10 m depth (10 m) during the three regimes summer/autumn (AUT), winter (WIN) and spring (SPR), displaying their (A) total (ind. m-3) and (B) relative abundance (%) of their life stages, and (C) total (mm3 m-3) and (D) relative biovolume (%) of their life stages. C1 – C5: copepodite stage CI – CV, F: female, M: male.*

**Suppl Figure 5**: Normalized abundances (% of max. abundance per taxon) of all taxa

**Cited References**

Cornils, A. et al. Testing the usefulness of optical data for zooplankton long-term monitoring: Taxonomic composition, abundance, biomass, and size spectra from ZooScan image analysis. Limnol. Oceanogr. 20, 428–450 (2022).

Ikeda, T. Respiration and ammonia excretion by marine metazooplankton taxa: synthesis toward a global-bathymetric model. Mar. Biol. 161, 2753–2766 (2014).

Kiørboe, T. Zooplankton body composition. Limnol. Oceanogr. 58, 1843–1850 (2013).

Kosobokova, K. & Hirche, H.-J. Zooplankton distribution across the Lomonosov Ridge, Arctic Ocean: species inventory, biomass and vertical structure. Deep Sea Research Part I: Oceanographic Research Papers 47, 2029–2060 (2000).

Oksanen, J. et al. vegan: Community Ecology Package. CRAN: Contrib. Packag. (2025) doi:10.32614/cran.package.vegan.

Postel, L., Fock, H. & Hagen, W. Biomass and abundance. in 83–192 (2000). doi:10.13140/2.1.4985.3765.
